# Supplementary material
Source: PubMed Central journal article supplement (PMC7655355)
Supplement: 18-00074.pdf [file 18-00074.pdf]

On-line Table 1: Summary of demographics and clinical diagnostic and treatment characteristics of patients with Moyamoya phenomenon<sup>a</sup>

|                             | Patients from Derdeyn et al. <sup>11</sup> 2017 | Patients Technically Adequate for Current Study | Patients with Increased Regional OEFR | Exclusions | Regional Cortical Thickness (mm) |      | Regional OEFR |       | Age at Scanning (yr) |    | Sex        |              | Time from Onset to Scanning (m) |      |
|-----------------------------|-------------------------------------------------|-------------------------------------------------|---------------------------------------|------------|----------------------------------|------|---------------|-------|----------------------|----|------------|--------------|---------------------------------|------|
|                             |                                                 |                                                 |                                       |            | Mean                             | SD   | Mean          | SD    | Mean                 | SD | No. (Male) | No. (Female) | Mean                            | SD   |
|                             |                                                 |                                                 |                                       |            |                                  |      |               |       |                      |    |            |              |                                 |      |
| Total                       | 50                                              | 35                                              | 30                                    |            | 2.49                             | 0.46 | 1.076         | 0.135 | 44                   | 12 | 12         | 23           | 22.2                            | 24.1 |
| Race/ethnicity              |                                                 |                                                 |                                       |            |                                  |      |               |       |                      |    |            |              |                                 |      |
| White                       | 36                                              | 28                                              | 23                                    |            | 2.49                             | 0.47 | 1.082         | 0.142 | 44                   | 12 | 10         | 18           | 21.6                            | 22.3 |
| Black                       | 11                                              | 6                                               | 6                                     |            | 2.43                             | 0.44 | 1.041         | 0.103 | 49                   | 13 | 2          | 4            | 14.4                            | 18.9 |
| Asian                       | 2                                               | 1                                               | 1                                     |            | 2.6                              | 0.38 | 1.095         | 0.069 | 37                   | 0  | 0          | 1            | 87.2                            | 0    |
| Hispanic                    | 1                                               | 0                                               | 0                                     |            |                                  |      |               |       |                      |    |            |              |                                 |      |
| Presentation                |                                                 |                                                 |                                       |            |                                  |      |               |       |                      |    |            |              |                                 |      |
| Ischemic stroke             | 23                                              | 11                                              | 11                                    |            | 2.41                             | 0.48 | 1.103         | 0.159 | 46                   | 15 | 4          | 7            | 22.5                            | 24.3 |
| TIA                         | 11                                              | 11                                              | 9                                     |            | 2.44                             | 0.45 | 1.089         | 0.147 | 45                   | 13 | 3          | 8            | 23.5                            | 30.7 |
| Hemorrhage                  | 6                                               | 5                                               | 4                                     |            | 2.49                             | 0.45 | 1.035         | 0.116 | 51                   | 6  | 2          | 3            | 21.0                            | 16.7 |
| Other                       | 10                                              | 8                                               | 6                                     |            | 2.63                             | 0.44 | 1.055         | 0.090 | 37                   | 6  | 3          | 5            | 21.0                            | 21.7 |
| Vasculopathy on angiography |                                                 |                                                 |                                       |            |                                  |      |               |       |                      |    |            |              |                                 |      |
| Unilateral                  | 10                                              | 10                                              | 9                                     |            | 2.59                             | 0.43 | 1.068         | 0.100 | 41                   | 9  | 3          | 7            | 26.6                            | 29.1 |
| Bilateral                   | 40                                              | 25                                              | 22                                    |            | 2.44                             | 0.47 | 1.080         | 0.150 | 46                   | 13 | 9          | 16           | 20.5                            | 22.3 |
| Lesions on MRI              |                                                 |                                                 |                                       |            |                                  |      |               |       |                      |    |            |              |                                 |      |
| Any cortical                | NA                                              | 9                                               | 9                                     | 9          |                                  |      |               |       |                      |    |            |              |                                 |      |
| Any white matter            | NA                                              | 4                                               | 4                                     |            | 2.46                             | 0.48 | 1.159         | 0.166 | 47                   | 18 | 2          | 2            | 16.6                            | 19.9 |
| Any basal ganglia           | NA                                              | 3                                               | 3                                     | 3          |                                  |      |               |       |                      |    |            |              |                                 |      |
| Surgical treatment          | 16                                              | 3                                               | 2                                     | 2          | 2.09                             | 0.42 | 1.107         | 0.088 | 72                   | 0  | 0          | 1            | 13.2                            | 0    |

**Note:**—NA indicates not applicable.

<sup>a</sup> The first column of data recalls results from Derdeyn, et al.<sup>11</sup> a broader superset of patients with Moyamoya phenomenon from a prospective natural history study. The second data column compares patients from this study. The third data column counts numbers of patients with an increased regional OEFR in this study. The fourth data column marks exclusions for lesions on MRI and surgical revascularization as detailed in Materials and Methods. All results for this table are from Destrieux et al.<sup>17</sup> FreeSurfer regions within MCA territories satisfying the inclusion and exclusion criteria. Identifying ethnicity and sex are important for the study of Moyamoya, which has high prevalence in children in eastern nations, but high prevalence for adult females in western nations.

**On-line Table 2: Results from mixed-effects models for measurements with granularity for Destrieux et al<sup>17</sup> FreeSurfer regions within MCA territories for hemispheres and patients<sup>a</sup>**

|                                | FreeSurfer Regions:<br>Thickness, 1 + OEFR +<br>Age + Sex +<br>Time + (1 + OEFR   Patient) (95% CI) |                       | Hemispheres: Thickness,<br>1 + OEFR + Age + Sex + Time +<br>(1   patient) (95% CI) |                       | Patients: Thickness,<br>1 + OEFR + Age +<br>Sex + Time + (1   Patient) (95% CI) |                       |
|--------------------------------|-----------------------------------------------------------------------------------------------------|-----------------------|------------------------------------------------------------------------------------|-----------------------|---------------------------------------------------------------------------------|-----------------------|
|                                |                                                                                                     |                       |                                                                                    |                       |                                                                                 |                       |
| Thickness intercept (mm)       | 3.50 (3.16–3.83)                                                                                    | P < .001              | 3.18 (2.78–3.58)                                                                   | P < .001              | 3.30 (2.63–3.97)                                                                | P < .001              |
| OEFR                           | –0.597 (–0.867 to –0.327) <sup>b</sup>                                                              | P < .001 <sup>b</sup> | –0.313 (–0.674–0.0484)                                                             | P = .09               | –0.437 (–1.08–0.211)                                                            | P = .2                |
| Age (yr)                       | –0.00765 (–0.0108 to –0.00448) <sup>b</sup>                                                         | P < .001 <sup>b</sup> | –0.00792 (–0.0115 to –0.00437) <sup>b</sup>                                        | P < .001 <sup>b</sup> | –0.00767 (–0.0114 to –0.00399) <sup>b</sup>                                     | P = .002 <sup>b</sup> |
| Sex                            | –0.0671 (–0.140–0.00607)                                                                            | P = .07               | –0.0381 (–0.128–0.0518)                                                            | P = .4                | –0.0377 (–0.129–0.0539)                                                         | P = .4                |
| Symptom onset to scanning (mo) | 0.000771 (–0.000878–0.00242)                                                                        | P = .4                | 0.000767 (–0.00108–0.00261)                                                        | P = .4                | 0.000902 (–0.00103–0.00284)                                                     | P = .3                |

<sup>a</sup> The best models, by the Akaike and Bayesian information criteria, from exploratory analyses are described in the Wilkinson Notation for covariates: OEFR, age, sex, time from symptom onset to scanning, and patient: identity. Models for measurement of granularities are arranged by columns. Fitting results for covariates are arranged by rows. The Indicator value for men is 0; for women, it is 1.

<sup>b</sup> Significant covariates.
